# Supplementary material for: Impacts of Poultry House Environment on Poultry Litter Bacterial Community Composition
Source: PubMed Central journal article supplement (PMC3174962; doi:10.1371/journal.pone.0024785), 2011-09-16
Supplement: pone.0024785.s001.pdf [file pone.0024785.s001.pdf]

Table S1. 16S rRNA gene primer sequences used with poultry litter samples.

| Sample name | Primer Sequence (5 <sup>1</sup> -3 <sup>1</sup> ) <sup>a</sup> |
|-------------|----------------------------------------------------------------|
| Dry 1       | GCCTCCCTCGCGCCATCAGACTCGTCTCATGCTGCCTCCCGTAGGAGT               |
| Dry 2       | GCCTCCCTCGCGCCATCAGACTGACTGCATGCTGCCTCCCGTAGGAGT               |
| Dry 3       | GCCTCCCTCGCGCCATCAGACTCGTCTCATGCTGCCTCCCGTAGGAGT               |
| Dry 4       | GCCTCCCTCGCGCCATCAGACTGCTCTCATGCTGCCTCCCGTAGGAGT               |
| Wet 1       | GCCTCCCTCGCGCCATCAGACTGACTGCATGCTGCCTCCCGTAGGAGT               |
| Wet 2       | GCCTCCCTCGCGCCATCAGAGAGACTGCATGCTGCCTCCCGTAGGAGT               |
| Wet 3       | GCCTCCCTCGCGCCATCAGAGACGTCTCATGCTGCCTCCCGTAGGAGT               |
| Wet 4       | GCCTCCCTCGCGCCATCAGAGAGCTCTCATGCTGCCTCCCGTAGGAGT               |
| All samples | 27F GCCTTGCCAGCCCGCTCAGTCAGAGTTTGATCCTGGCTCAG                  |

<sup>a</sup> blue region is the 454 linker, red region is the barcode, green region is the primer sequence
